# Supplementary material for: Immunotherapy with engineered bacteria by targeting the STING pathway for anti-tumor immunity
Source: PubMed Central journal article supplement (PMC7264239; doi:10.1038/s41467-020-16602-0), 2020-06-01
Supplement: 41467_2020_16602_MOESM1_ESM.pdf [file 41467_2020_16602_MOESM1_ESM.pdf]

## **Supplementary Information**

### **Immunotherapy with engineered bacteria by targeting the STING pathway for anti-tumor immunity**

Leventhal et al.

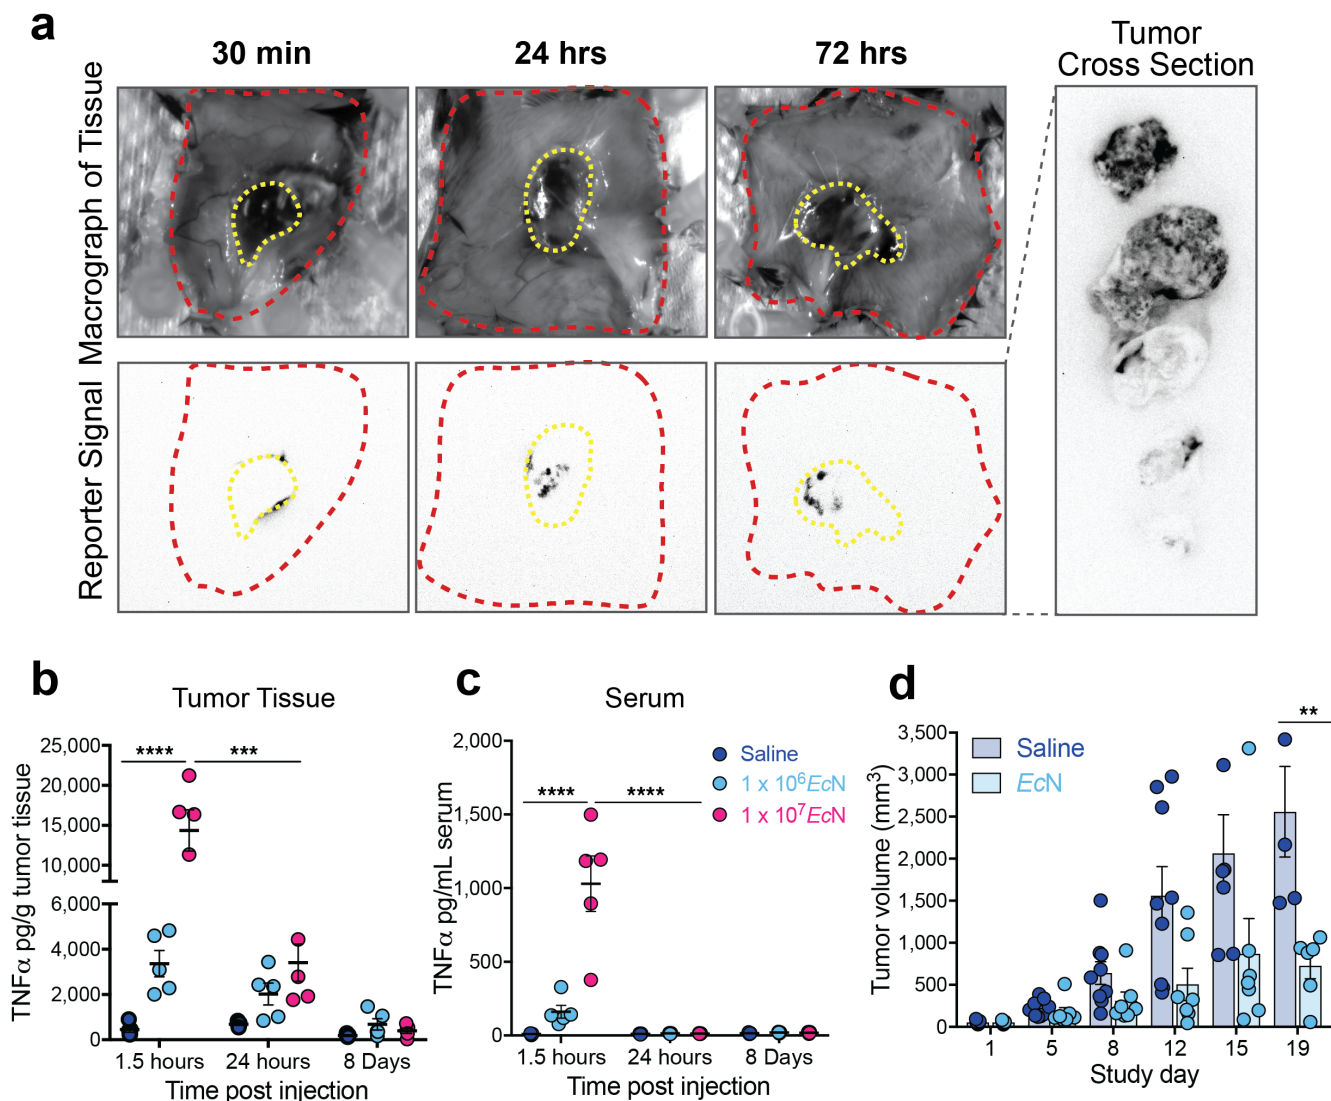

**Supplementary Figure 1. *E. coli*. Nissle is a versatile platform for localized modulation of the tumor microenvironment. (Supplementary data for Fig. 1).** **a**, Subcutaneous B16.F10 tumors ( $n=3$  mice per group) were established, allowed to reach  $500\text{--}800\text{ mm}^3$  and  $1 \times 10^6$  CFUs of *EcN*-LuxABCDE were intratumorally injected. At 30 mins, 24 hrs and 72 hrs post injection, tumors and surrounding healthy tissue were harvested, photographed and imaged to detect distribution of bioluminescence (reporter signal) across tumors and healthy tissue which indicates bacterial colonization. Red dotted lines represent the edge of the boarding healthy skin tissue with yellow dotted lines representing the border of the tumor. Following imaging, tumors were detached from the skin and serial sections were lined side-by-side to view bioluminescence distribution of bacteria within the tumor on macroscopic level. **b,c**, CT26 tumor-bearing mice ( $n=5$  mice per group) were treated once i.t. as indicated. TNF- $\alpha$  quantification from tumor (**b**) and serum (**c**) shown at the indicated time points. (\*\*\* $P=0.0002$ , \*\*\*\* $P<0.0001$ , two-way ANOVA with Tukey's multiple comparisons tests). **d**. Individual tumor volumes for Figure 1f ( $n=9$  mice for saline and  $n=7$  mice for *EcN* treatment groups at the beginning of the study, \*\* $P=0.0062$  for two-tailed unpaired Student's t-test comparing saline ( $n=4$ ) vs *EcN* ( $n=6$ ) treated groups on day 19 of study). Each circle in **b-d** represents an individual animal. Data are mean with s.e.m.

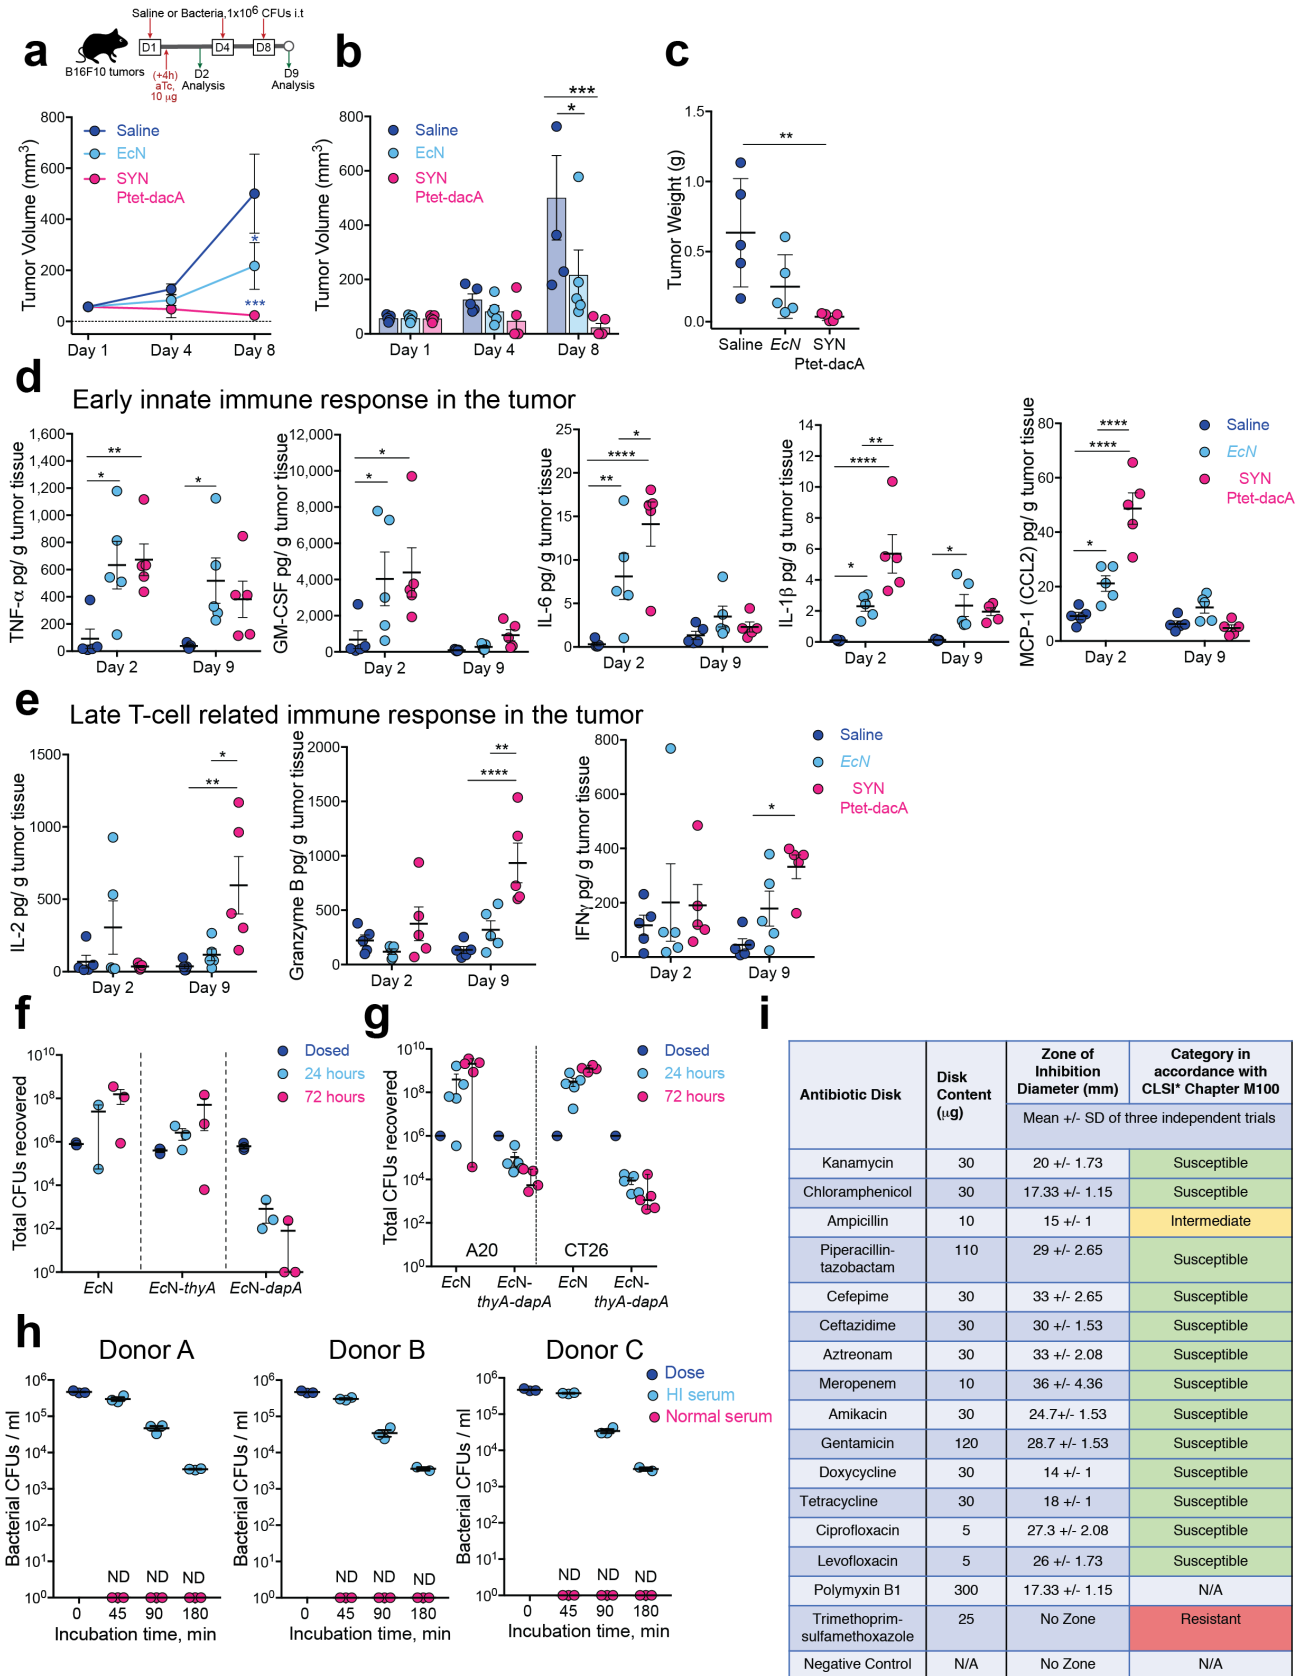

**Supplementary Figure 2. Engineering a STING agonist producing live therapeutic SYN1891 (Supplementary data for Fig. 2).** a-e, B16.F10 tumor-bearing mice (n=5 per group per time point) were intratumorally (i.t.) administered with  $1 \times 10^6$  CFUs of *EcN* or SYN-pTet-dacA bacteria, or saline injection controls, on study days 1, 5 and 8. Four hours post i.t. injection all mice received 10 µg anhydrous tetracycline (aTc) via intraperitoneally injection

(to induce *dacA* expression for the SYN-pTet-*dacA* treated mice and as control for all other groups). Cohorts of mice were then euthanized on study day 2 and 9, with tumors harvested, weighed and homogenized to isolate tumor supernatants. Supernatants were then assayed with the panel of cytokines shown using a custom Luminex panel. **a**, Average and **b**, individual tumor volumes on days 1, 4 and 8. **c**, Tumor weight on day 9 (**a**, **b** \*P=0.0163, \*\*\*P=0.0002, two-way ANOVA with Tukey's multiple comparisons tests; **c**, \*\*P=0.0086, one-way ANOVA with Tukey's multiple comparisons tests). Early innate immune cytokines upregulated in tumors on day 2 are shown on panel **d** (\*P= [0.015÷0.044], \*\*P= [0.0018÷0.0089], \*\*\*\*P<0.0001, two-way ANOVA with Tukey's multiple comparisons tests). Late T-cell related cytokines upregulated in tumors on day 9 are shown on panel **e** (\*P= [0.016÷0.038], \*\*P= [0.0013÷0.0052], \*\*\*\*P<0.0001, two-way ANOVA with Tukey's multiple comparisons tests). **f**, Total CFUs recovered from B16.F10 tumors i.t.-injected with  $1 \times 10^6$  CFUs of either prototrophic *EcN* or strains containing either a *thyA* or *dapA* auxotrophy at the indicated time-points. **g**, Total CFUs recovered from A20 or CT26 tumors i.t.-injected with  $1 \times 10^6$  CFUs of either prototrophic *EcN* or a strain containing dual *thyA* and *dapA* auxotrophies at the indicated time-points. Each circle in **b-g** represents an individual animal and data are mean with s.e.m. **h**, Sensitivity of SYN1891 to human serum.  $5 \times 10^5$  CFUs/ ml of SYN1891 were incubated in 90% of either normal human serum (3 donors, n=3 replicates per donor per time point) or heat-inactivated (HI, at 65°C for 30 min) serum from a corresponding donor at 37°C for indicated period of time. Recovered CFUs/ ml are show for each donor. N.D. – not detected. Each circle represents an individual replicate. Data are mean with s.e.m. **i**, Antibiotic susceptibility testing of SYN1891 for a panel of 16 antibiotics.

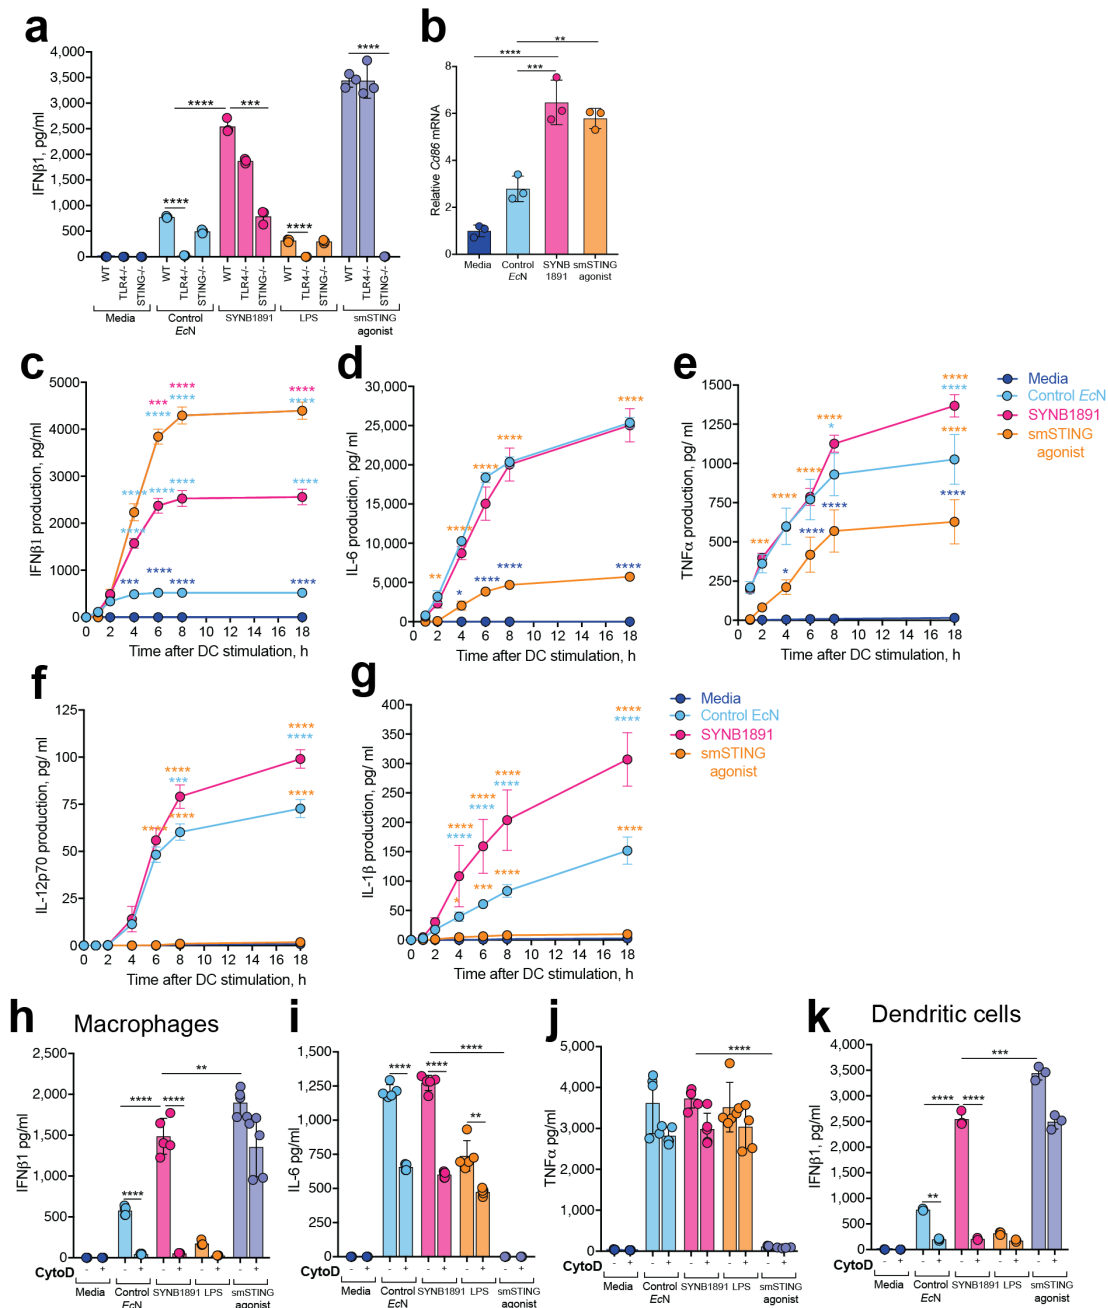

| Innate Immune Signal       | Bacterial Chassis   |                        | SYNB1891            |                        | smSTING Agonist     |                        |
|----------------------------|---------------------|------------------------|---------------------|------------------------|---------------------|------------------------|
|                            | Relative Expression | Phagocytosis Dependent | Relative Expression | Phagocytosis Dependent | Relative Expression | Phagocytosis Dependent |
| Type I IFN                 | +                   | Yes                    | +++                 | Yes                    | ++++                | No                     |
| Pro-inflammatory cytokines |                     |                        |                     |                        |                     |                        |
|                            | TNFα                | +++                    | No                  | ++++                   | No                  | ++                     |
| IL-6                       | ++++                | Partial                | ++++                | Partial                | +                   | No                     |
| IL-12p70                   | +                   | Not Determined         | ++                  | Not Determined         | -                   | Not Determined         |
| IL-1β                      | +                   | Not Determined         | ++                  | Not Determined         | -                   | Not Determined         |
| Co-stimulation CD86        | +                   | Not Determined         | ++                  | Not Determined         | ++                  | Not Determined         |

**Supplementary Figure 3. Phagocytosis- and STING-dependent induction of Type I interferon by SYNB1891 (Supplementary data for Fig. 3).** a, WT, TLR4<sup>-/-</sup> and STING<sup>-/-</sup> BMDCs were treated with Control EcN (MOI: 25), pre-induced SYNB1891 (MOI: 25), LPS (100 ng/mL), or smSTING agonist (5 μg/mL) for 4 hours (n = 3 biological replicates per group per genotype) and IFN-β1 protein secretion was quantified (\*\*P=0.0003, \*\*\*\*P< 0.0001, two-way ANOVA

with Tukey's multiple comparisons tests). **b-g**, WT BMDCs were treated as described in **a** for 18 hours (n = 3 biological replicates per group). Cells were analyzed for the upregulation of CD86 mRNA (**b**, \*\*P=0.0013, \*\*\*P=0.0003, \*\*\*\*P<0.0001, one-way ANOVA with Tukey's multiple comparisons tests) and for kinetics of indicated cytokine secretion at the indicated time points (**c-g**), \*P= [0.0125÷0.0223], \*\*P=0.09, \*\*\*P= [0.0002÷0.0004], \*\*\*\*P<0.0001, two-way ANOVA with Tukey's multiple comparisons tests, dark blue stars – indicated group vs media, blue stars – indicated group vs control *EcN*, pink stars – indicated group vs SYN1891, yellow stars – indicated group vs smSTING Agonist. **h-j**, RAW 264.7 macrophages (n = 5 biological replicates per group) or **k**, WT BMDCs (n = 3 biological replicates per group) were treated as described in **a** for 4 hours. In the indicated groups cells were pre-treated with for 1 hour with Cytochalasin D (10µM). Macrophages or BMDCs incubated in media alone served as a negative control. Cells were analyzed for protein secretion of IFN-β1 (**h,k**), IL-6 (**i**) and TNF-α (**j**). **h-k**, \*\*P= [0.001÷0.008], \*\*\*P= 0.0002, \*\*\*\*P<0.0001, two-way ANOVA with Tukey's multiple comparisons tests. (**a-k**) Data are representative of two or more independent experiments per cell type with mean and s.d. shown. Each circle represents an independent experimental replicate. **I**, Table summarizing the data shown in Fig. 3 and Supplementary Fig. 3. This table illustrates the relative expression levels of Type I IFN (IFN-β1), other proinflammatory cytokines and co-stimulatory markers (CD86) following treatment with SYN1891, non-engineered *EcN* or smSTING-agonist.

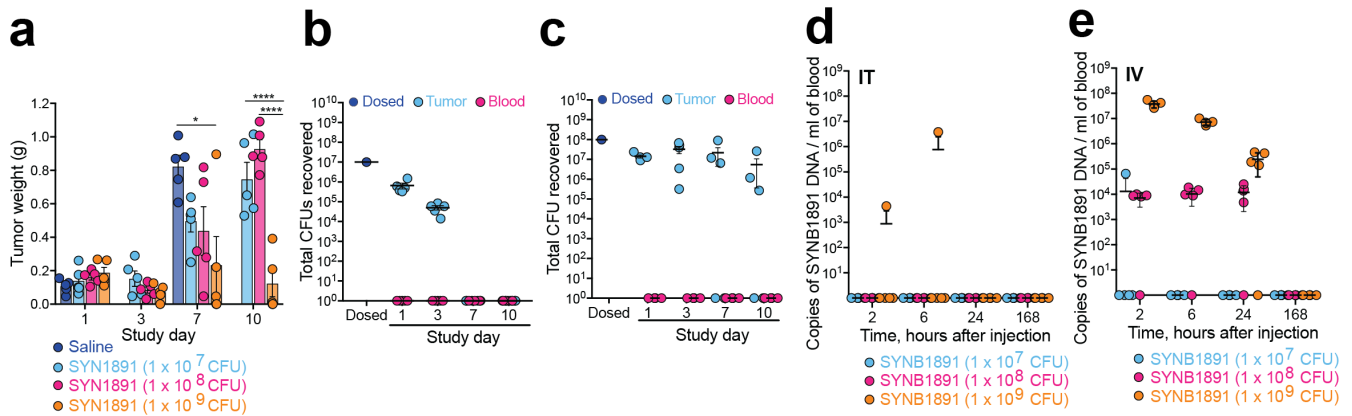

**Supplementary Figure 4. *In Vivo* dynamics of SYN1891 in tumor bearing mice (Supplementary data for Fig. 4).** B16.F10 tumor-bearing mice ( $n=5$  mice per bacterial group per time point,  $n=5$  per saline group for day 1 and day 7) were treated with a single i.t. dose of either saline,  $1 \times 10^7$  or  $1 \times 10^8$  CFUs SYN1891 on Study Day 0. (a) Individual tumor volumes at different time points (\*  $P=0.0163$ , one-way ANOVA with Tukey's multiple comparisons tests for Day 7 ; \*\*\*\*  $P < 0.0001$ , two-way ANOVA for bacterial groups with Tukey's multiple comparisons tests. Bacterial abundance within tumor homogenates and blood at the indicated timepoints post-i.t. injection with  $1 \times 10^7$  (b) and  $1 \times 10^8$  (c) doses. SYN1891 was either intratumorally (IT, d) injected into B16.F10 tumor bearing mice or as a positive control for bacterial abundance in blood, intravenously (IV, e) injected into healthy age-matched controls at the indicated doses ( $n=5$  mice per group per time point). Blood was then harvested at the indicated time points and the presence of SYN1891 bacterial DNA was detected by SYN1891 probe specific qPCR. (a-e) Data are representative of two or more independent experiments with mean and s.e.m. shown. Each circle represents an individual animal.

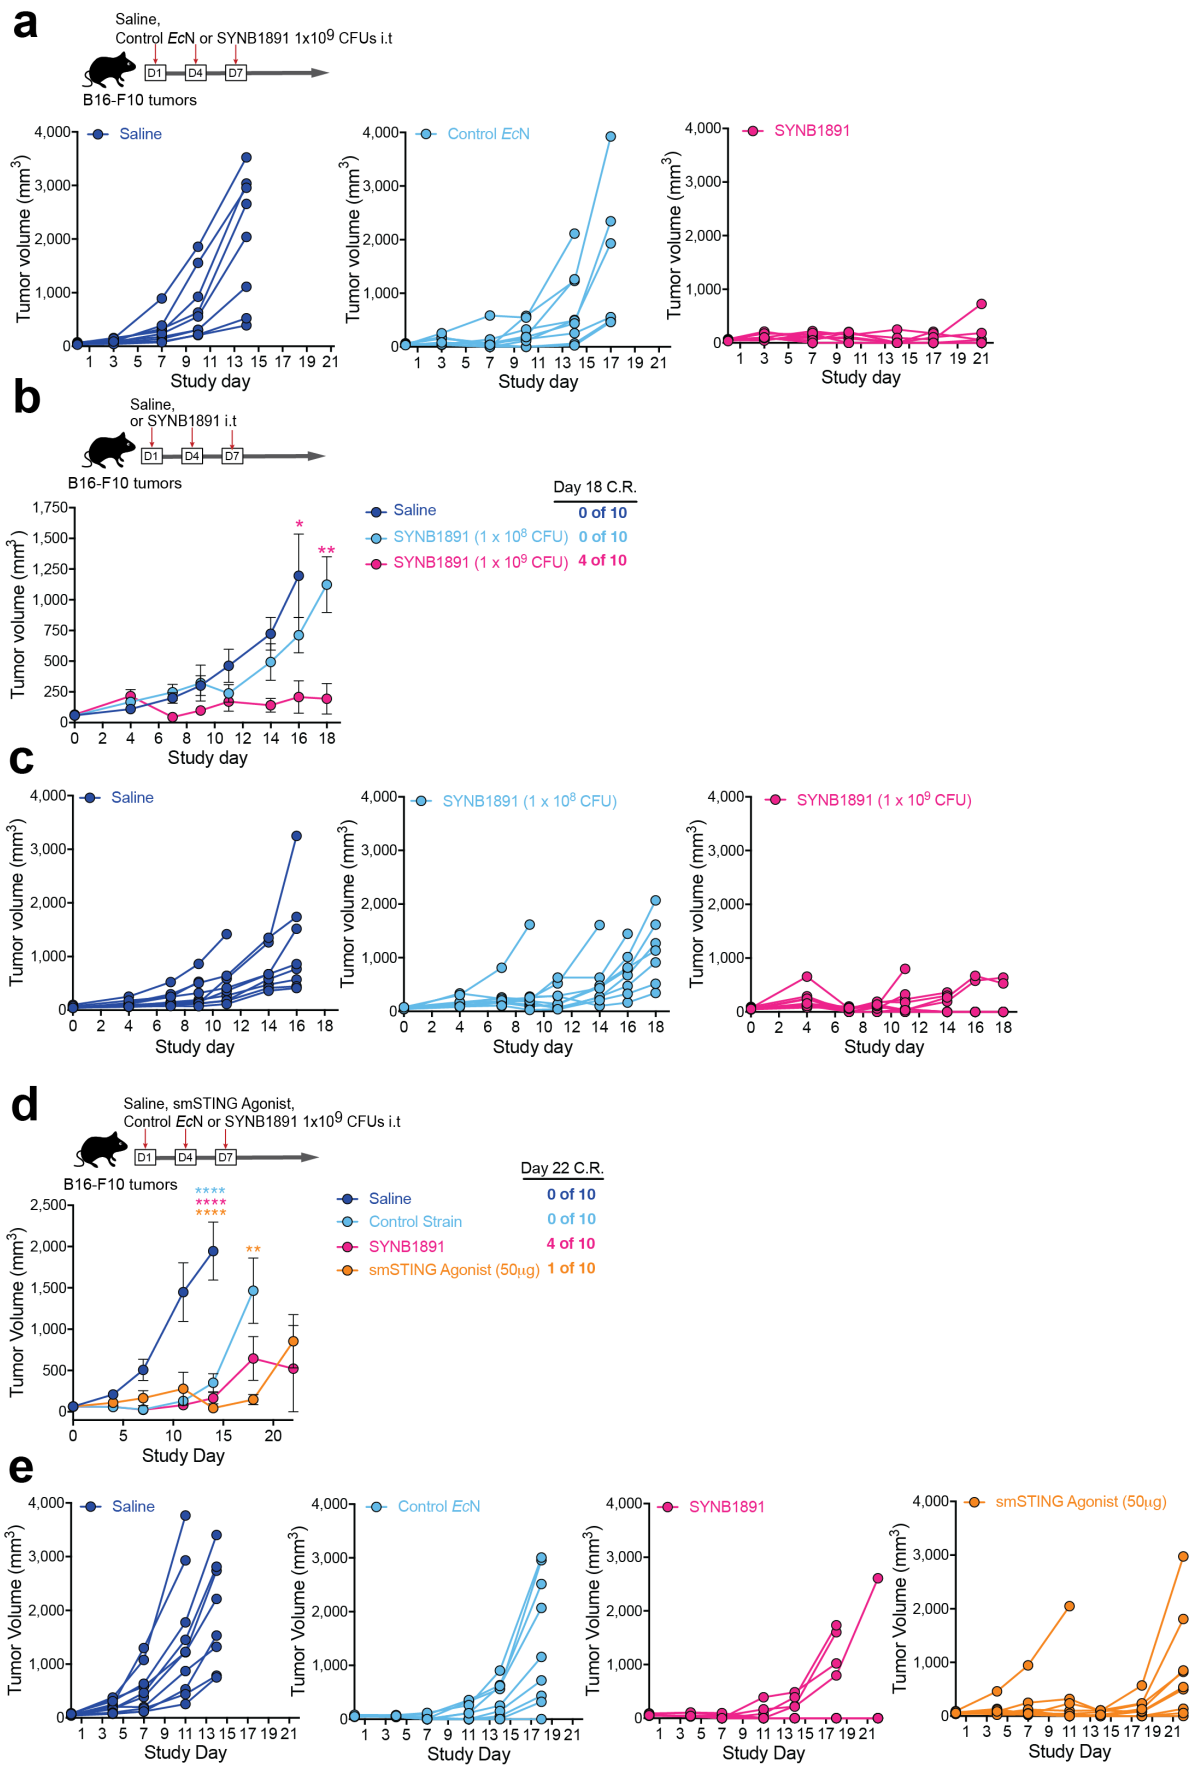

**Supplementary Figure 5. SYN1891 treatment triggers efficacious antitumor immunity and immunological memory (Supplementary data for Fig. 5). a.** On Study days 1, 4 and 7, B16.F10 tumor-bearing mice ( $n=10$  mice per



group) were treated with i.t. doses of either saline (injection control),  $1 \times 10^9$  CFUs SYN1891 or  $1 \times 10^9$  CFUs of Control *EcN* lacking the  $P_{fms-dacA}$  circuit. Individual tumor growth data is shown. **b,c** On Study days 1, 4 and 7 B16.F10 tumor-bearing mice (n=10 mice per group) were treated with i.t. doses of either saline (injection control),  $1 \times 10^8$  CFUs SYN1891 or  $1 \times 10^9$  CFUs of SYN1891. Representative tumor growth data is shown with the ratio of complete responders (C.R.) or mice having no palpable tumor on Study day 18 (**b**, \* P=0.03 (pink stars - indicated group vs  $1 \times 10^9$  CFUs of SYN1891) one-way ANOVA with Tukey's multiple comparisons tests for Day 16; \*\* P =0.0059, two-tailed unpaired Student's *t*-test of two SYN1891 treatment groups at Day 18), or as individual tumor growth (**c**). (**d, e**) On Study days 1, 4 and 7 B16.F10 tumor-bearing mice (n=10 mice per group) were treated with i.t. doses of saline (injection control),  $1 \times 10^9$  CFUs of Control *EcN* lacking the  $P_{fms-dacA}$  circuit,  $1 \times 10^9$  CFUs SYN1891 or 50 $\mu$ g small molecule STING agonist (smSTING Agonist). Doses were separated by three days. Representative tumor growth data is shown with the ratio of C.R. on Study day 22. Average tumor volumes are shown for each group up until the date where greater than 50% of mice are taken off study (**d**, \*\*\*\* P<0.0001 (blue stars – indicated group vs control *EcN*, pink stars – indicated group vs SYN1891, yellow stars – indicated group vs smSTING Agonist) one-way ANOVA with Tukey's multiple comparisons tests for Day 14; \*\* P =0.0066 (yellow stars – indicated group vs smSTING Agonist) one-way ANOVA with Tukey's multiple comparisons tests for Day 18). Individual tumor growth data is shown (**e**). (**a-e**) Data are representative of two or more independent experiments with mean and s.e.m. shown (**b,d**) or each circle as an individual animal.

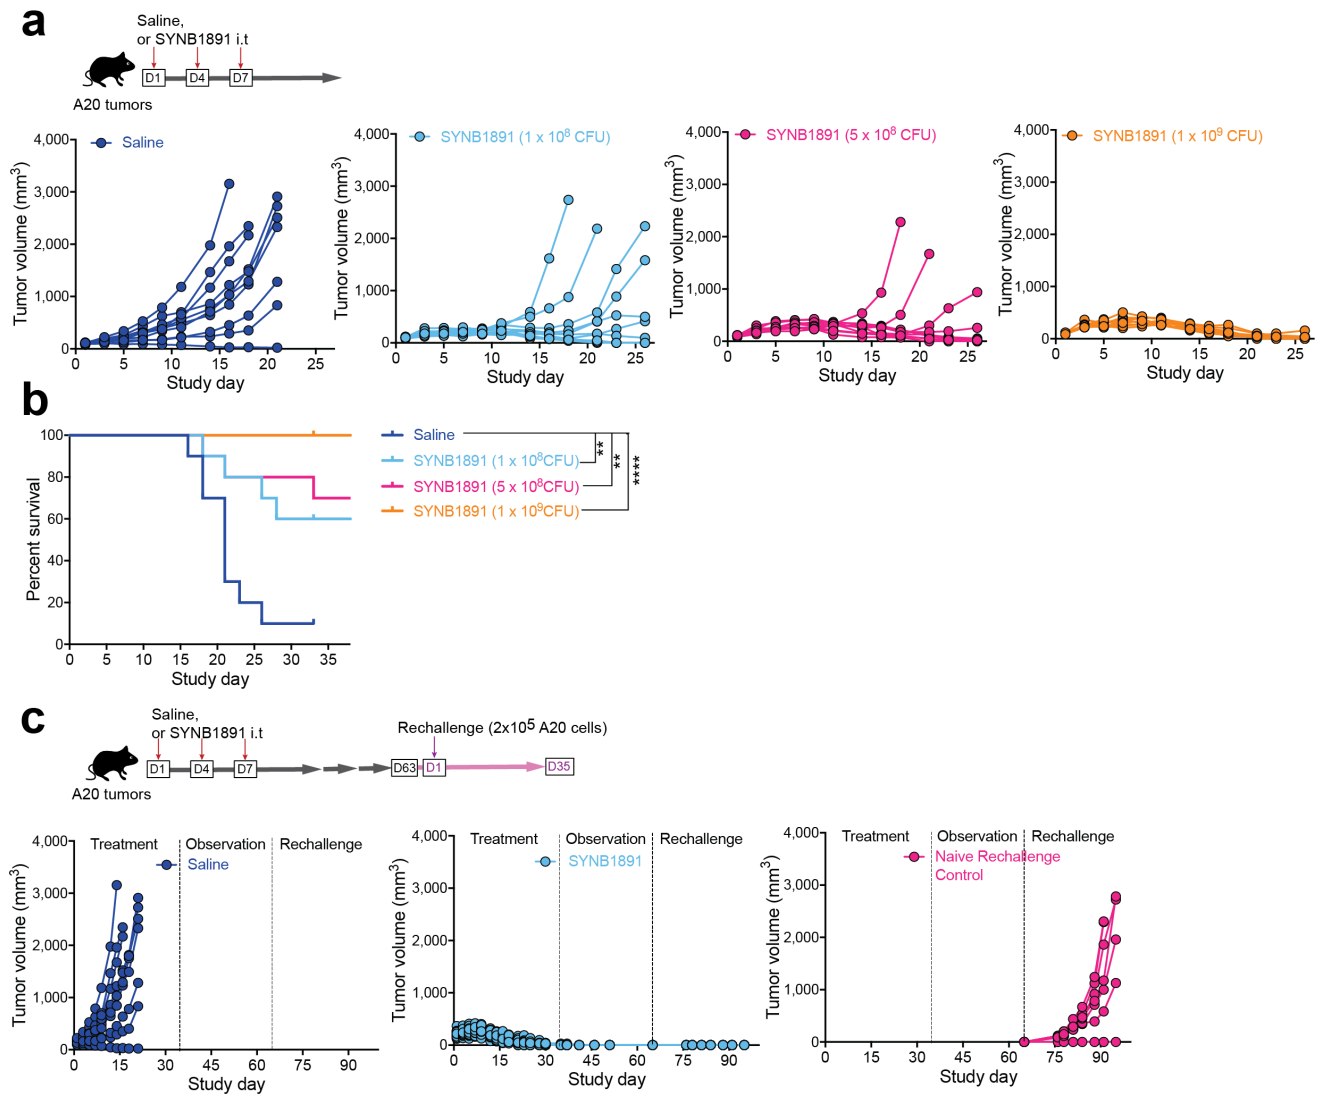

**Supplementary Figure 6. SYNB1891 treatment triggers efficacious antitumor immunity and immunological memory (Supplementary data for Fig. 5).** **a, b,** On Study days 1, 4 and 7, A20 tumor-bearing mice (n=10 mice per group) were treated with i.t. doses of either saline or varying quantities of SYNB1891 as indicated. Individual tumor growth data (**a**) and long-term survival (**b**, \*\*P=[0.0043÷0.0084], \*\*\*\*P<0.0001, Mantel-Cox log-rank comparisons for the indicated groups) are shown. Data are representative of three independent experiments. **c,** Mice (n = 10 per group) treated as described in **a** from all SYNB1891 treatment groups which remained tumor free by Study day 50 were rechallenged by subcutaneous injection of A20 cells on the contralateral flank alongside naïve age-matched controls. Individual tumor volumes are presented. (**a-c**) Data are representative of two or more independent experiments, each circle represents an individual animal.

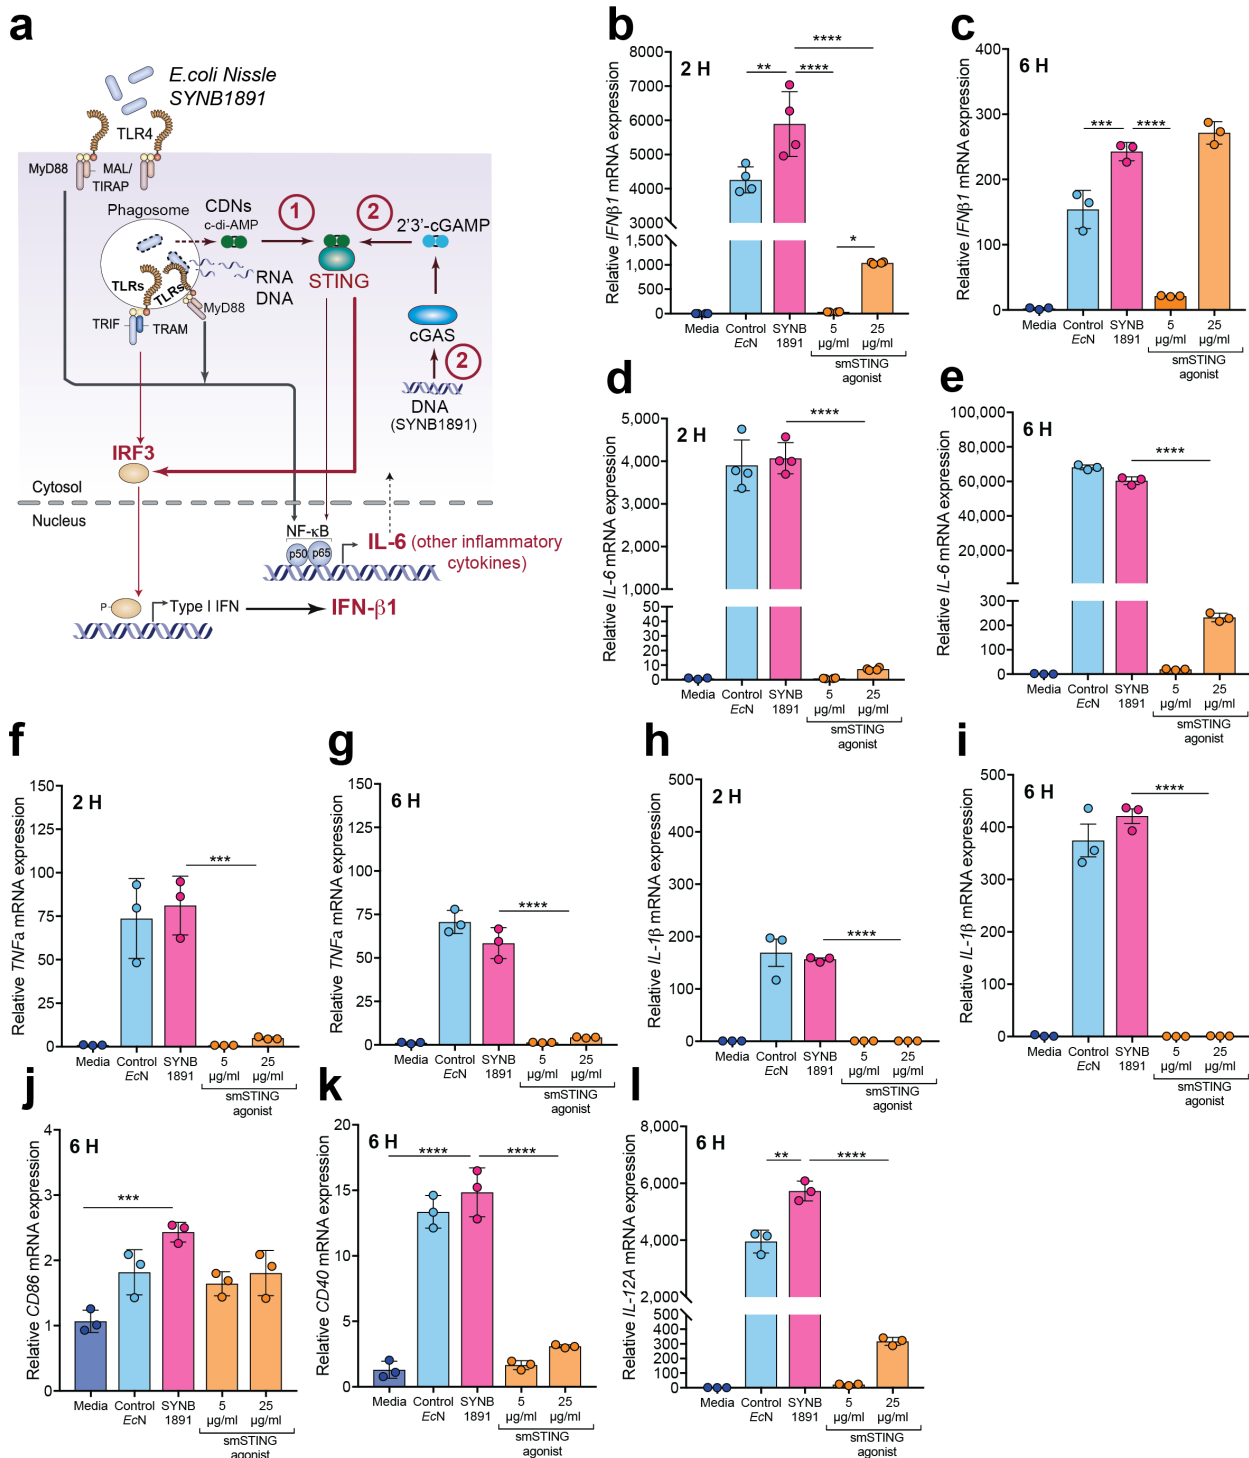

**Supplementary Figure 7. SYNB1891 Activity in Human Antigen-presenting Cells (Supplementary data for Fig. 6).** **a**, Illustration for the proposed mechanism of action for SYNB1891 in human antigen presenting cells (APCs). STING activation in human APCs by SYNB1891 consists of 2 signals: (1) direct STING activation by bacterial c-di-AMP and (2) indirect activation through bacterial DNA- cGAS-STING axis. Other bacterial ligands (such as LPS) readily available in gram- negative *E. coli Nissle* stimulate proinflammatory signaling through a variety of pattern recognition receptors and NF-κB activation. **b-l**, Monocyte-derived primary human DCs were treated with Control EcN (MOI: 25), pre-induced SYNB1891 (MOI: 25), LPS or smSTING agonist (5 and 25 μg/mL) for 2 and 6 hours (n=3 replicates per group per time point). Human DCs incubated in media alone served as negative control. Cells were analyzed for the early upregulation of *IFNB1* (**b**), *IL6* (**d**), *TNFα* (**f**) or *IL1β* (**h**) mRNA at 2 hours (2 H) and late upregulation of *IFNB1* (**c**), *IL6* (**e**), *TNFα* (**g**), *IL1β* (**i**), *CD86* (**j**), *CD40* (**k**) and *IL-12A* (**l**) mRNA at 6 hours (6 H). Data are mean with s.d. Each circle represents an independent experimental replicate. \*P= 0.0474, \*\*P= [0.0011÷0.0044], \*\*\*P= [0.0002÷0.0005], \*\*\*\*P<0.0001, one-way ANOVA with Tukey's multiple comparisons tests.

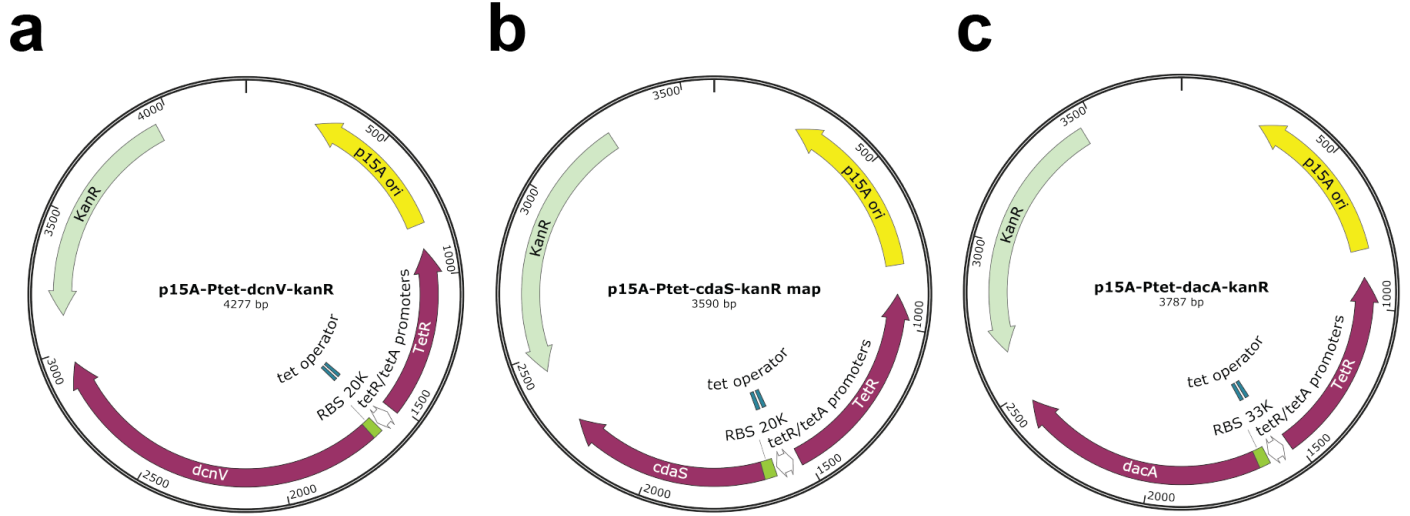

**Supplementary Figure 8. Maps of STING agonist (CDA)-producing plasmids used in this study. a,** p15A plasmid with expression of cyclic dinucleotide synthetase DcnV under the control of Ptet promoter. **b,** p15A plasmid with expression of cyclic dinucleotide synthetase CdaS under the control of Ptet promoter. **c,** p15A plasmid with expression of cyclic dinucleotide synthetase DacA under the control of Ptet promoter.

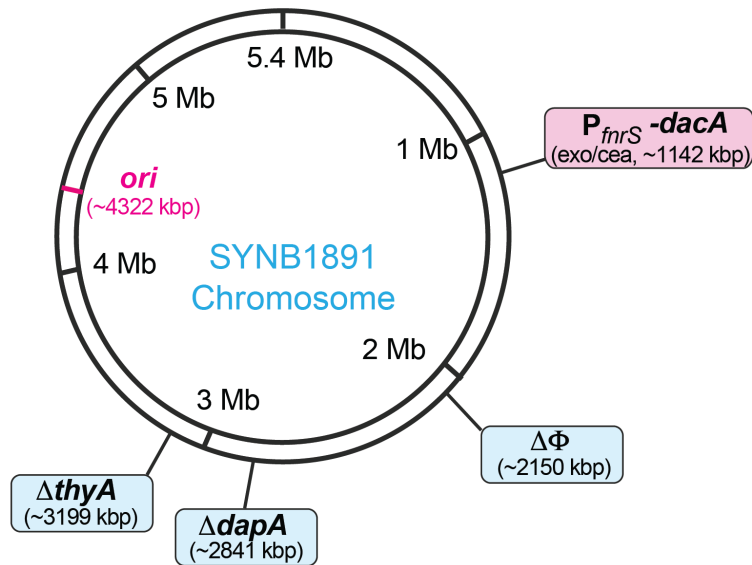

**Supplementary Figure 9. Map of SYN1891 Genome.** The locations of the genomic modification sites in SYN1891 are shown, with kbp designation indicating the chromosomal position relative to the 0/5.4 Mb reference marker. The chromosomal origin of replication is shown as a pink line. Pink text box designates *dacA* gene insertions and light blue text boxes with  $\Delta$  symbol designate the locations of the *dapA*, *thyA* and  $\Phi$  deletion. Gene names in parenthesis refer to the upstream and downstream genes surrounding the inserted genes.

Abbreviations: *exo/cea* = intergenic region between the *exo* and *cea* genes; kbp = kilo base pair; *dacA* = cyclic-di-AMP synthase from *Listeria monocytogenes*;  $P_{fmrS}$  = anaerobic inducible promoter activated by the fumarate and nitrate reductase transcriptional activator, FNR;  $\Delta dapA$  = deletion of *dapA* gene (leading to auxotrophy);  $\Delta thyA$  = deletion of *thyA* gene (leading to auxotrophy);  $\Delta \Phi$  = partial deletion of endogenous Nissle prophage

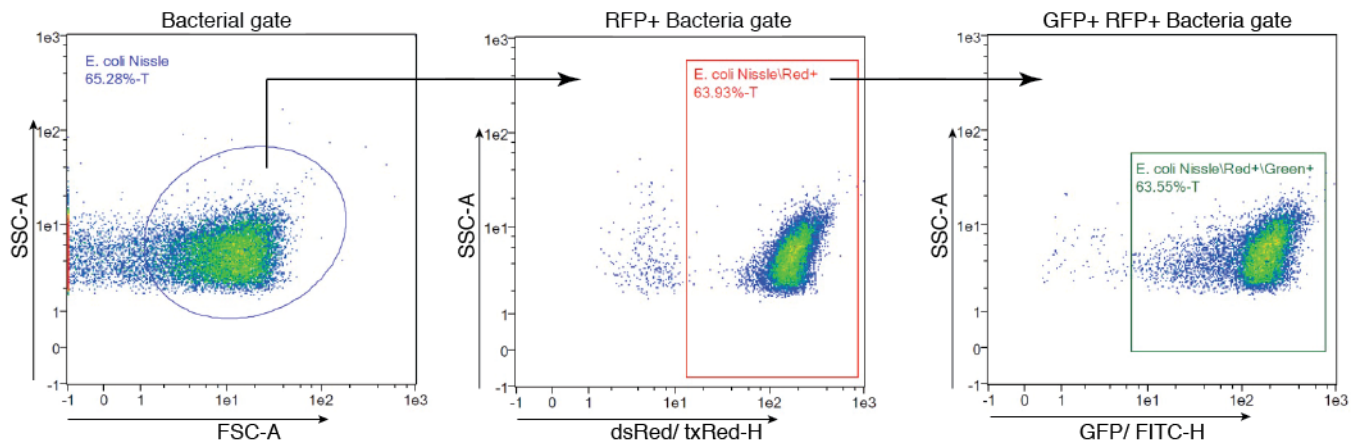

**Supplementary Figure 10. Flow cytometry gating strategy for bacteria, example.** This example corresponds to data in Fig.2d. Macsquant VYB flow cytometer was used to analyze the samples and collected the data. The data were analyzed using MACSQuantify software provided by Miltenyi Biotec. Detector settings: FSC = 580V, SSC = 340V, Y2 (red) = 820V, B1 (green) = 660V. The FSC and SSC were set up specifically for the visualization of *E. coli* Nissle. The gating strategy was set up with *E. coli* Nissle strains with no fluorescent proteins (negative control), with red fluorescent protein only (single positive control), or with red and green fluorescent proteins expressed in one strain (double positive control).

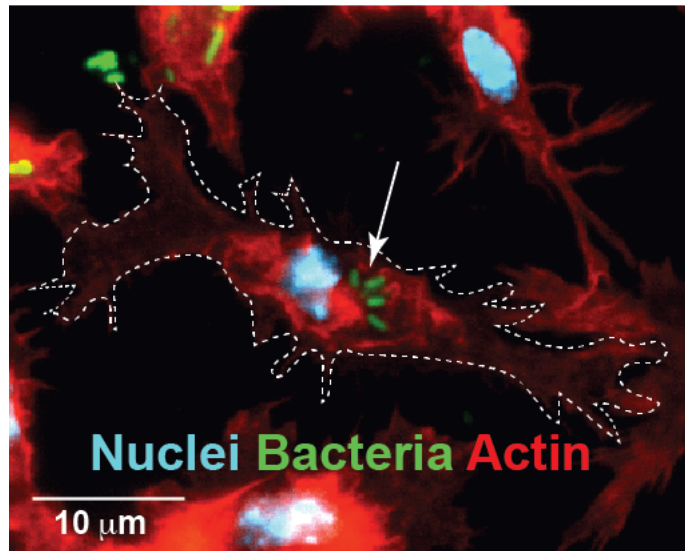

**Supplementary Figure 11. Phagocytosed bacteria quantification example.** This example corresponds to microscopy data in Fig.3 d-g and is representative of an individual DC containing phagocytosed bacteria from 7 FOV from 2 independent experiments. For phagocytosis analysis, WT BMDCs were incubated with pre-induced SYN1891-*gfp* (MOI: 25) for 1h in control media and non-internalized bacteria were washed out. Cells were stained for microscopy: cell nuclei were labeled with Hoechst (Blue), F-actin was stained with ActinRed 555 probe (Red), SYN1891-*gfp* were labeled with anti-GFP (Green). The outline of dendritic cell labeled with ActinRed 555 is shown in white dotted line. White arrow points to the bacteria (in green) localized within the cellular border and surrounded by F-actin. These bacteria were counted as internalized by dendritic cell.

**Supplementary Table 1. List of strains used in this publication**

| Name/Reference                                                 | Synlogic Strain # | Genotype                                                                                                                                         | Description                                                                                                                                                                                                                               | Activity Induction |
|----------------------------------------------------------------|-------------------|--------------------------------------------------------------------------------------------------------------------------------------------------|-------------------------------------------------------------------------------------------------------------------------------------------------------------------------------------------------------------------------------------------|--------------------|
| <i>Not Referenced</i>                                          | SYN001            | Control bacterium                                                                                                                                | N/A                                                                                                                                                                                                                                       | N/A                |
| <i>EcN</i>                                                     | SYN094            | SYN001 with strep resistance                                                                                                                     | Control bacterium with strep resistance                                                                                                                                                                                                   | N/A                |
| <i>EcN-LuxABCDE</i>                                            | SYN5353           | SYN94, pST-constitutive- <i>luxABCDE-cmR</i>                                                                                                     | Bacterium with constitutively expressed luminescence producing pathway enzymes LuxA, LuxB, LuxC, LuxD and LuxE                                                                                                                            | N/A                |
| SYN- <i>P<sub>tet</sub>-dncV</i>                               | SYN3526           | SYN001, p15A- <i>P<sub>tet</sub>-dncV-kanR</i>                                                                                                   | Bacterium with plasmid containing cyclic dinucleotide synthetase DcnV                                                                                                                                                                     | aTc                |
| SYN- <i>P<sub>tet</sub>-dacA</i>                               | SYN3527           | SYN001, p15A- <i>P<sub>tet</sub>-dacA-kanR</i>                                                                                                   | Bacterium with plasmid containing cyclic dinucleotide synthetase DacA                                                                                                                                                                     | aTc                |
| SYN- <i>P<sub>tet</sub>-cdaS</i>                               | SYN3528           | SYN001, p15A- <i>P<sub>tet</sub>-cdaS-kanR</i>                                                                                                   | Bacterium with plasmid containing cyclic dinucleotide synthetase CdaS                                                                                                                                                                     | aTc                |
| SYN- <i>mcherry-P<sub>tet</sub>-gfp, P<sub>tet</sub>-gfp</i>   | SYN4360           | SYN001, <i>malE/K::P<sub>constitutive</sub>-mCherry-cmR, p15A-P<sub>tet</sub>-gfp-kanR</i>                                                       | Bacterium with constitutively expressed mCherry and plasmid containing gene encoding GFP under the control of Ptet promoter                                                                                                               | aTc                |
| SYN- <i>mcherry-P<sub>sal</sub>-gfp, P<sub>sal</sub>-gfp</i>   | SYN4352           | SYN001, <i>malE/K::P<sub>constitutive</sub>-mCherry-cmR, p15A-P<sub>sal</sub>-gfp-kanR</i>                                                       | Bacterium with constitutively expressed mCherry and plasmid containing gene encoding GFP under the control of Psal promoter                                                                                                               | salicylate         |
| SYN- <i>mcherry-P<sub>cmt</sub>-gfp, P<sub>cmt</sub>-gfp</i>   | SYN4353           | SYN001, <i>malE/K::P<sub>constitutive</sub>-mCherry-cmR, p15A-P<sub>cmt</sub>-gfp-kanR</i>                                                       | Bacterium with constitutively expressed mCherry and plasmid containing gene encoding GFP under the control of Pcmt promoter                                                                                                               | cumate             |
| SYN- <i>mcherry-P<sub>fnrS</sub>-gfp, P<sub>fnrS</sub>-gfp</i> | SYN4359           | SYN001, <i>malE/K::P<sub>constitutive</sub>-mCherry-cmR, pSC101-P<sub>fnrS</sub>-gfp-P<sub>constitutive</sub>-mcherry-ampR</i>                   | Bacterium with constitutively expressed mCherry and plasmid containing gene encoding GFP under the control of PfnrS promoter                                                                                                              | anaerobic          |
| SYN- <i>P<sub>fnrS</sub>-dacA</i>                              | SYN4448           | SYN094, p15A- <i>P<sub>fnrS</sub>-dacA-kanR</i>                                                                                                  | Bacterium with plasmid containing gene encoding cyclic dinucleotide synthetase DacA under the control of PfnrS promoter                                                                                                                   | anaerobic          |
| <i>EcN-thyA</i>                                                | SYN1534           | SYN001, $\Delta$ <i>thyA</i> -cmR                                                                                                                | Control bacterium with thymidine auxotrophy                                                                                                                                                                                               | N/A                |
| <i>EcN-dapA</i>                                                | SYN766            | SYN001, $\Delta$ <i>dapA</i> -cmR                                                                                                                | Control bacterium with diaminopimelic acid auxotrophy                                                                                                                                                                                     | N/A                |
| <i>EcN-thyA-dapA, Control EcN</i>                              | SYN4740           | SYN001, $\Delta$ <i>thyA, \Delta</i> <i>dapA, \Delta</i> $\Phi$                                                                                  | Control bacterium with phage fragment knockout and thymidine and diaminopimelic acid auxotrophy                                                                                                                                           | N/A                |
| SYNB1891-cmR                                                   | SYN4910           | SYN001, $\Delta$ <i>thyA-cmR, \Delta</i> <i>dapA, \Delta</i> $\Phi, \text{exo/cea}::\text{-P}_{fnrS}\text{-dacA}$                                | Bacterium with integrated <i>dacA</i> gene under the control of PfnrS promoter, phage fragment knockout and thymidine and diaminopimelic acid auxotrophy                                                                                  | anaerobic          |
| SYNB1891- <i>gfp</i>                                           | SYN5674           | SYN001, $\Delta$ <i>thyA-cmR, \Delta</i> <i>dapA, \Delta</i> $\Phi, \text{exo/cea}::\text{-P}_{fnrS}\text{-dacA, pSC101-P}_{cl}\text{-gfp-ampR}$ | Bacterium with integrated <i>dacA</i> gene under the control of PfnrS promoter, plasmid containing gene encoding GFP under the control of constitutive promoter, phage fragment knockout and thymidine and diaminopimelic acid auxotrophy | anaerobic          |
| SYNB1891                                                       | SYN4933           | SYN001, $\Delta$ <i>thyA, \Delta</i> <i>dapA, \Delta</i> $\Phi, \text{exo/cea}::\text{-P}_{fnrS}\text{-dacA}$                                    | Bacterium with integrated <i>dacA</i> gene under the control of PfnrS promoter, phage fragment knockout and thymidine and diaminopimelic acid auxotrophy without any antibiotic marker                                                    | anaerobic          |



**Supplementary Table 2. DNA sequences for STING agonist (CDA)- producing enzymes**

| Name/Reference | DNA sequence                                                                                                                                                                                                                                                                                                                                                                                                                                                                                                                                                                                                                                                                                                                                                                                                                                                                                                                                                                                                                                                                                                                                                                                                                                                                                                                                                                                                                                                                            |
|----------------|-----------------------------------------------------------------------------------------------------------------------------------------------------------------------------------------------------------------------------------------------------------------------------------------------------------------------------------------------------------------------------------------------------------------------------------------------------------------------------------------------------------------------------------------------------------------------------------------------------------------------------------------------------------------------------------------------------------------------------------------------------------------------------------------------------------------------------------------------------------------------------------------------------------------------------------------------------------------------------------------------------------------------------------------------------------------------------------------------------------------------------------------------------------------------------------------------------------------------------------------------------------------------------------------------------------------------------------------------------------------------------------------------------------------------------------------------------------------------------------------|
| <i>dcnV</i>    | <p>ATGCGCATGACGTGGAACCTCCATCAATATTATACAAACCGCAACGATGGCTTAATGGGTAAATT<br/> GGTTTTGACCGATGAAGAAAAGAATAATTTGAAAGCTTTGCGTAAGATTATCCGCCTTCGCACGC<br/> GCGACGTGTTTGAGGAAGCAAAGGGCATCGCCAAAGCCGTAAAGAAAAGCGCGTTGACTTTTGA<br/> GATCATCCAGGAGAAGGTTAGCACGACGCAAATTAACATCTTTCCGATAGTGAGCAGCGCGAG<br/> GTAGCTAAGTTAATCTACGAAATGGATGATGACGCGCGTGATGAATTCCTGGGTCTTACTCCCG<br/> TTTCTGGACACAAGGCTCGTTCCAATACGACACCCTTAATCGTCCATTTCAACCAGGACAGGAAA<br/> TGGACATTGACGACGGAACGTATATGCCGATGCCATTTTTGAGAGTGAACCCAAGATTGGTCAT<br/> TCGCTTTTGATTTTACTGGTAGACGCCAGCTTAAAAAGCTTAGTCGCTGAAAATCATGGCTGGAA<br/> ATTCGAAGCAAAGCAAACCTGCGGGCGTATTAAGATCGAAGCAGAAAAAACCCATATCGACGTA<br/> CCTATGTACGCGATTCCGAAGGATGAATTCCAGAAAAAGCAAATCGCTCTTGAAGCCAACCGCT<br/> CGTTTGTGAAAGGGGCGATCTTGAATCATACGTTGCAGACAGTATCACTGATGACTCCGAGACG<br/> TATGAGTTGGACTCTGAGAATGTTAATTTAGCTTTACGCGAAGGTGATCGCAAATGGATTAATTC<br/> AGACCCCAAAATTGTAGAAGATTGGTTCAACGACTCCTGTATCCGCATTGGTAAGCACCTGCGTA<br/> AAGTTTGCCGTTTTATGAAGGCTTGCGGTGACGCCAGTGGGACGTTGGAGGGCCTTCGTCTATC<br/> TCTTTGATGGCCGCGACTGTGAATATTTTAGACTCTGTTGCACACGATGCAAGCGACCTGGGCGA<br/> AACCATGAAGATTATCGCTAAGCATTACCCTCCGAGTTCGCACGTGGGGTAGAATCCCCGACT<br/> CGACGGATGAGAAACCTCTGTTTCCCTCCATCTTATAAACACGGTCCACGTGAGATGGACATTATG<br/> AGCAAGCTTGAGCGCCTTCCAGAAATCCTGTCAAGTGTGAATCGGCTGACAGTAAGTCTGAGG<br/> CCCTGAAAAAATTAACATGGCGTTTGGGAATCGTGTGACCAATTCTGAACTGATTGTCCTGGCT<br/> AAAGCTCTTCCAGCCTTGTCTCAGGAGCCTTCAAGCGCTAGTAAGCCAGAAAAGATTTTCGTCAAC<br/> GATGGTGTCTGGGTGA</p> |
| <i>cdaS</i>    | <p>ATGAAAGCTATGCGCTACGAACAAATTTCCGAAAACGCTTTCAAAGGGAAGATTCAAGTTTATCT<br/> GGAGCAAATTTGGGTGATGCTTCCCTTATCTTAAAGACACTGCACGAGAAAGACCAGTGTTTAC<br/> TTTGTGAGCTGGACGACCTTGGACATGTCTTTCAGGACATGCAAGGTATCGCGTCCTCCTTTTATT<br/> TACAAAGCTACATTGAGGAATTTACACCGGCGTTCATCGAACTGGCCAAGGCAATCAAAGCTCT<br/> GAGCGAACATAAGCACGGTGCCTTGATTGTGATTGAGCGCGCGGACCCGGTCGAGCGTTTCATC<br/> CAGAAAGGCACGTCATTACATGCAGAAATCTCCAGCTCGCTTATCGAGTCAATTTTCTTCCGGG<br/> CAACCCACTGCATGATGGTGCCCTTCTGGTCCGCGAAAATAAGTTAGTGTGACGCGGTAACGTAC<br/> TGCCGCTTACAACCAAGAGGTGGACATTCATTGGGCACGCGCCATCGCGCGGCGTTAGGTAT<br/> GTCAGGGTACACCGACGCCCTTGTCTTAGTGGTGTGCGAAGAAACGGGTAAGATGAGTTTCGCC<br/> AAAGATGGAGTCTTGTACCCTTAATCTCCCCACGCACCTGA</p>                                                                                                                                                                                                                                                                                                                                                                                                                                                                                                                                                                                                                                                                                                                                                                                |
| <i>dacA</i>    | <p>ATGGACTTTTCCAACATGAGTATCCTTCACTATTTAGCGAATATTGTAGACATTTTGGTGGTTTGG<br/> TTCGTAATTTACAAGGTTATCATGCTTATCCGCGGCACGAAAGCCGTCCAGCTGTTGAAGGGGAT<br/> TTTCATTATTATTGCCGTCAGTTACTTAGCGGCTTCTTCGGATTGCAGACAGTGGAAATGGATTAC<br/> TGATCAAATGCTGACTTGGGGTTTCTTAGCCATTATCATTATCTTTCAACCGGAATTGCGTCGTGC<br/> CCTGGAGACTTTGGGGCGTGGCAATATCTTTACCCGCTATGGATCACGCATTGAGCGTGAACAAC<br/> ACCACCTTATTGAGTCTATTGAAAAGTCCACGCAATACATGGCGAAGCGTCGCATTGGAGCTTTG<br/> ATCTCTGTGGCTCGTGATACAGGCATGGACGACTACATCGAGACTGGCATTCCGCTTAATGCGAA<br/> AATCTCATCGCAATTATTGATTAATATCTTATCCCCAATACCCCTCTTACAGATGGCGCAGTGAT<br/> CATTAAAGGTAACGAGATCGCGAGCGCTGCCAGTTATCTGCCATTGTCCGACTCGCCGTTTCTTT<br/> CTAAGGAGCTGGAACTCGCCATCGTGCCGCAATTAGGGATTTCCGAGGTGACAGATTCAATCAC<br/> AATCGTTGTACGAGGAAACAGGTGGGATTTCCCTTACGAAGGGAGGCGAAGCTGTTCCGTGAT<br/> GTATCCGAAGAAGAATTGCATAAGATTTTGCTTAAAGAGCTGGTACTGTACAGCTAAAAAAC<br/> CAAGCATTTTCTCAAATGGAAAGGAGGTAAGTCCGAGTGA</p>                                                                                                                                                                                                                                                                                                                                                                                                                                                                                                                                                        |

**Supplementary Table 3. Sequence Analysis of the *exo/cea::P<sub>fms</sub>-dacA* insertion**

| DNA Sequence                                                                                                                                                                                                                                                                                                                                                                                                                                                                                                                                                                                                                                                                                                                                                                                                                                                                                                                                                                                                                                                                                                                                                                                                                                                                                                                                                                                                                                                                                                                                                                                                                                                                                                                                                                                                                                                                                                                                                                                                                                                                                                                                                                                                                                                                                                                                                                                                                                                                                                                                                                                                                                                                                                                                                                                                                                                                                                                                                                                                                                                                                                                                                                                                                                                                                                                                                                                                                                                                                                             | Comments                                                                                                                                                                                                                                                                                                                                                                                                      |
|--------------------------------------------------------------------------------------------------------------------------------------------------------------------------------------------------------------------------------------------------------------------------------------------------------------------------------------------------------------------------------------------------------------------------------------------------------------------------------------------------------------------------------------------------------------------------------------------------------------------------------------------------------------------------------------------------------------------------------------------------------------------------------------------------------------------------------------------------------------------------------------------------------------------------------------------------------------------------------------------------------------------------------------------------------------------------------------------------------------------------------------------------------------------------------------------------------------------------------------------------------------------------------------------------------------------------------------------------------------------------------------------------------------------------------------------------------------------------------------------------------------------------------------------------------------------------------------------------------------------------------------------------------------------------------------------------------------------------------------------------------------------------------------------------------------------------------------------------------------------------------------------------------------------------------------------------------------------------------------------------------------------------------------------------------------------------------------------------------------------------------------------------------------------------------------------------------------------------------------------------------------------------------------------------------------------------------------------------------------------------------------------------------------------------------------------------------------------------------------------------------------------------------------------------------------------------------------------------------------------------------------------------------------------------------------------------------------------------------------------------------------------------------------------------------------------------------------------------------------------------------------------------------------------------------------------------------------------------------------------------------------------------------------------------------------------------------------------------------------------------------------------------------------------------------------------------------------------------------------------------------------------------------------------------------------------------------------------------------------------------------------------------------------------------------------------------------------------------------------------------------------------------|---------------------------------------------------------------------------------------------------------------------------------------------------------------------------------------------------------------------------------------------------------------------------------------------------------------------------------------------------------------------------------------------------------------|
| <p>gccctataactgaaatacagccagcaatacgtgatgcgtatggccttctgccagcgcctgtttccagagc<br/> gtgccattcagctccaactcgtgtcaggcgtagttacgcaggctgcgttcaaggatgatgattgctcactgc<br/> gaacctcccttgccacgcagtagttgctcataactgctcaggttatgctgtatcacattgactactggcaacgcct<br/> ttcctttataccaggaagcgcacagccgggtgcagatccacgtttccgggggattcaacatctgtccatac<br/> ctttgccacgactgagatacgtcgtatcctgcagccagttcaggcatgtaccatcagccttccctgccatgtc<br/> ggactccagatgattacataagcgcagccacagcctccgcaattcatcgtctggcaggatgtcatttctcagcg<br/> ttgcatggcagaacgcaccgggctttttgccagactgtcgtatcacatgctggaagtcgatacgcagggcccg<br/> cgtcttccctttctggtctgacacgagggcagctcatgacctcgtcgtccaacgtaacggctcagacgatc<br/> gtccataaccggaccgtaacagttgacctacaagccgggaaggtagcgtgtagacgatgtgcttcacattg<br/> atggtactgctgcggtaaacctcacagtcagcactgcgacgaagcggcagcggtttcagatgaagacgttct<br/> tccttgatcagatcatgattgttacggttgccgcataacctgctgagtgatgaaggcctgatattctctatggt<br/> gctgaagtcgttactgccccgcagtatcagcgcctgacagatacgcctttcagatgccgtgggcactttcaa<br/> ccgagccatttctgtggccccgaccggaattattatgtacgcctgcattccgtagtgcgacagatagcagtat<br/> aacgtcagtcagctcgcggcgtccatct<b>CCGCCAGTTGTCCGAGGGCTTCCTGCAGAC<br/> CTTCAGCCAGAGCAGAGAAGCTCTTACCACCCAGCACAAACCCGCATCCAGC<br/> TCCAGTGGCTCCATTCCAGACGGAAGTGATACTTACCAGCAGATGGTGA<br/> CAACTACACCTTTCAGTTCAGTAAAGTCCGACAGGCCTCGCAGACCGGGCT<br/> GATGTCGCTGGCGGAACATGACCTCCTGCTCTGCACTATACTGTAGCTTCCA<br/> TTCGCGAACCCGCCGTTGCATTGTTCTTCGAAGGCTGTTGGGATACTGGCC<br/> GGGATATTTATCCTGTAGCATCTCCAGCAGAGTGTGTTGGTGTGTCAGAGCCGG<br/> CCTCTCTTTCAACAGAGGAACAAGCATGCTGCCACATGTCTCCAGACTTCCAGAGG<br/> AAGCTTTGCGTGTGCGCCAGTGCCGAACACTGTTGTTTTCCCACTCTCCTTT<br/> TTCGATCCGACGACCAGAATGGACTGAGATACCAGCCTTCATGGCCGAGAT<br/> ATGCGGTTCGGTCAGGTGGTATTTGAAACCAGACTGAAGCCCACGGTCGTCA<br/> TCGGGACGCAGGCCGCCGCCGTCATGGTATCAGTGAGCAGGCACTCTGCCG<br/> GAGCACCATCATGGACTGATGTGGTGCAGGCAACTGCGTCATGCAATCGGGG<br/> ACCGACCAGTAATTATCTTTAATGCCCGGTTTCGACATCCGCATTCTGAAAAA<br/> GACTGCTGCCGCACATAGCGATCCGGCTGACTGGCTGGAAGAAGTACGGT<br/> ATATTGTGTGATGGAGCTGGCTGCAGGATATTATGGAGCCTCCAACCGCTA<br/> TGGCACTATTTCACTGGCCTGTGCTGCCAGCCAGACCGGACTGAACTGGGA<br/> AGGGCAGGCACACTCAGCGATCGCTGACGCACGGATGACGGCAGGGGTGG<br/> TAAACGCTATTGCTGCATATCATCTGGAAGTCTGTCAGGAACAGGCACGGC<br/> TGAAAACCTGACTGCCTGGCCTGTATACCAGCAATCATTACGTTATCCAGCG<br/> ATTGTGTAGGCTGGGTGAATAGCTGATAAAGCGTTCGCGCTGCATTCGGCA<br/> GTTTAATTAAGTTGTTCTTATTGGTGGTGTGCTTATGGTTGCATCGTAG<br/> TAAATGGTTGTAACAAAAGCAATTTTTCCGGCTGTCTGTATACAAAACGCC<br/> GCAAAGTTTGAGCGAAGTCAATAAACTCTTACCCATTCAGGGCAATATCTC<br/> TCTTGGATCCAAAGTGAACCCGCATCCCACGCTAACTAATATAAGGGGGGC<br/> AAGAATGGACTTTTCCAACATGAGTATCCTTCACTATTTAGCGAATATTGTA<br/> GACATTTTGGTGGTTTGGTTCGTAATTTACAAGGTTATCATGCTTATCCGCG<br/> GCACGAAAGCCGTCCAGCTGTTGAAGGGGATTTTCATTATTATTGCCGTCAA<br/> GTTACTTAGCGGCTTCTTCGGATTGCAGACAGTGAATGGATTACTGATCAA<br/> ATGCTGACTTGGGATTTCTTAGCCATTATCATTATCTTTCAACCGGAATTGC<br/> GTCGTGCCCTGGAGACTTTGGGGCGTGGCAATATCTTTACCCGCTATGGAT<br/> CACGATTGAGCGTGAACAACACACCTTATTGAGTCTATTGAAAAGTCCAC<br/> GCAATACATGGCGAAGCGTCGATTGGAGCTTTGATCTCTGTGGCTCGTGA<br/> TACAGGCATGGACGACTACATCGAGACTGGCATTCCGCTTAATGCGAAAAT<br/> CTCATCGCAATTATTGATTAATATCTTCATCCCAATACCCCTCTTCACGAT<br/> GGCGCAGTGATCATTAAAGGTAACGAGATCGCGAGCGCTGCCAGTTATCTG<br/> CCATTGTCCGACTCGCCGTTTCTTCTAAGGAGCTGGGAACCTCGCCATCGTG<br/> CCGCATTAGGGATTTCCGAGGTGACAGATTCAATCACAATCGTTGTCAGCG<br/> AGGAAACAGGTGGGATTTCCCTTACGAAGGGAGGCGAACTGTTCCGTGATG<br/> TATCCGAAGAAGAATTGCATAAGATTTTGCTTAAAGAGCTGGTACTGTCAC<br/> AGCTAAAAAACCAAGCATTCTTCCAAATGAAAAGGAGGTAAGTCCGAGTG</b></p> | <p>The uppercase, bolded blue letters represent the engineered region of the EcN genome, including the <i>dacA</i> insertion and the EcN sequence homology arms used for homologous recombination into the EcN genome</p> <p>Lowercase black letters include EcN sequence upstream and downstream from the intended genomic insertion location</p> <p>The entire listed sequence here is confirmed by WGS</p> |

AGGAGGAACGATTGGTAAACCCGGTGAACGCATGAGAAAGCCCCGGAAG  
ATCACCTTCCGGGGGCTTTTTTATTGCGCGGACAAAACGAAAAAGACGC  
TCGGGAGGAGCTGCTTCGAAGTTCCTATACTTTCTAGAGAATAGGAACTTC  
GGAATAGGAACTAAGGAGGGACGTAATATATCAATAAATAGCAATCCCC  
AGATACCTAATGTAGTTCAGCAAGCACGGCCGGGAGCTTGTTCTGCCTG  
CGTTTTCTTCAATTGAGCAGTAGACCATTTAGCTGTGGCATGAATGGCTGCA  
GAACTTTCCTGTTGCTACCTCCAGTTCACCACCGCTGCCAGAGCCACTCC  
CGTCTGGATTATCATTCAAAGAGTAATGATTACCTGCCCTTATCATCATA  
AGGAACACCATCTTTATAGTACGCTACAGCTGTTCCATTATAAAATCCTCT  
TTGACATTA AAAACAATCAGTTAAAAATAAGTACTGCATATATAATTACTGG  
TTTTATATACAGCATAAAAAATTACGCCGCTGCGTTTTCCCTGTCAACCCTGT  
GGATTTTCATTTTTGTGAAAACGATCAAAAAACAATACTCACAATTCGACA  
GTCCC GCCAGATACCGCAAAACCGGCCAGACGTTACCGTTTTCCGGGACCA  
TGATATGAGCCCCGTTGGGGAGGGTATGGAGTTGCTGAAAATGACGGTCAG  
ATTGAGTTCACCGTTTTATTGTTACAGGAGGCCAGGGCTTGTCTGCTACCGG  
TCCGGACGAGAGGGATACCGGGAATTTGAATCCGGTTAACTGAGCCGGACA  
TACGGTAAATAAGGAATGCAGGCAGAACGGGAGTCACTGCAGGATGAGACC  
GGCACTACAGCAGAAAAACAGGTGATTCTGGTACGGCTCAGCCACTAAACA  
CAGTTGGA AACTGATGATAAGATAGTCAGCGGTTATATAACTCACTAGATAA  
AAAGATATAAAGGTAAGGAGACACTCATGAGTCGTTCCGGTAGCACACTGT  
ATCTTATCGCCCTGCTGACAGCGGCAACGGTCCTGACAGCCTGCACGCCAA  
AGGGCAGTATGGAACAACATACCCGGCATTACGTTTATGCATCAGATGACG  
GTTTTGATCCTAACTTTTCCACCCAGAAGGCCGACACAACA cgaatgatggtgctttt  
ttcggcagttctgggatatgggagctaaagataaagcgacaggaaaatcatggagtgatgtgcaacaacgcc  
ttcagcagtttcacagccaggaattttaactcactccggggcacaactcaatttcggggtaccgattaccgca  
gcaaagacftaccccaaaaaaatccaggctgctggctgacaccattcagcggttatctcgatggttatgaga  
gctgacagtgacggggaacgttgcgggggaataaagatattgggggtaggctgagcccagaatattggtac  
ctccctgcccctcaatattcggtgatggccggacaaggagtccaggagagggggattagtggtggatctgc  
gccaggtcgtcttcagctttatgacgctattacgggtcaatgccgttctgcagcatggttacgggtaatttcagagt  
ggcttggagctcactttctgaacgacttattagcgtgtgctccgggtattgcacatgcgcaaatcttcagcca  
aaggaggtaatcatcacggcgattacgttcaaatccccgcgcctcttctgctccaattcagcattgagtacc  
acgtaacgctcccagcgttcacgcaactgtgcgagcttttagcggttaattcttggtgacaaaggcttctgtatt  
caaagtcataagatgcccttcagatatgcatgtacgccttcaacacatcagtcagagtgatggttactttgt  
tgcctttcaacaagcggccctgccagctatgccagaaggcctgatggcgcagacagcttctgctattcgca  
gcaaccacaaatccataaagattcctcgtgcaactttgaacggctatttgtcaacgacggatga

**Supplementary Table 4. Sequence Analysis of the *ΔdapA* deletion**

| DNA Sequence                                                                                                                                                                                                                                                                                                                                                                                                                                                                                                                                                                                                                                                                                                                                                                                                                                                                                                                                                                                                                                                                                                                                                                                                                                                                                                                                                                                                                                                                                                                                                                                                                                                                                                                                                                                                                                                                                                                                                                                                                                                                                                                                                                                                                                                                                                                                                                                                                                                                                            | Comments                                                                                                                                                                                                                                                                                                                                                                                                      |
|---------------------------------------------------------------------------------------------------------------------------------------------------------------------------------------------------------------------------------------------------------------------------------------------------------------------------------------------------------------------------------------------------------------------------------------------------------------------------------------------------------------------------------------------------------------------------------------------------------------------------------------------------------------------------------------------------------------------------------------------------------------------------------------------------------------------------------------------------------------------------------------------------------------------------------------------------------------------------------------------------------------------------------------------------------------------------------------------------------------------------------------------------------------------------------------------------------------------------------------------------------------------------------------------------------------------------------------------------------------------------------------------------------------------------------------------------------------------------------------------------------------------------------------------------------------------------------------------------------------------------------------------------------------------------------------------------------------------------------------------------------------------------------------------------------------------------------------------------------------------------------------------------------------------------------------------------------------------------------------------------------------------------------------------------------------------------------------------------------------------------------------------------------------------------------------------------------------------------------------------------------------------------------------------------------------------------------------------------------------------------------------------------------------------------------------------------------------------------------------------------------|---------------------------------------------------------------------------------------------------------------------------------------------------------------------------------------------------------------------------------------------------------------------------------------------------------------------------------------------------------------------------------------------------------------|
| <p>gtaggctgctgcggttatctaaatcccaacctgcagttatagtcaccggatgccagacctggatcgc<br/> tcgcgccagttcgtgccattcgtgtcagacagcggcttataagttacggccatgttgccctgcgaac<br/> gggtgctgtcggctcactttcatgccacttttccagcgcagctggcagacgttgccaaaccacattga<br/> acggcccgcgtacgaccagcattggtaaaccgggtgcatcagctgcactttgtacgtccatagtggtg<br/> gaggcacggtttgcgcagcgttcgcccgtcagtgccagatttatccagaccggcggaaataacgtt<br/> catcatctccgtgctgtaacgctgcatggaagccgcgtctgcaaccggttcccgcctgtccagggt<br/> cagcagtttaaccgtaaccgcctgctgataaccctgcggcttaacagagattgataacgaccacgata<br/> ctgctcgtcttcgtccagacgggtccattgtaccaatcgggtggtcagtgctgtgaccagcatcacgtt<br/> gggtgatggtgtagttttcgcctgcagcacgctaaccacctgcggccacagagtattgccacgacca<br/> ttttccaccagcaatgaagcgggtatcggcctgaaactgggtacgcgcgccagaaccagtgccagcg<br/> gctgggtggtggacgaatgtccagcgccttaccgacggcaccactaccgttggtcaccgggattgc<br/> ataatcggcggagggtaccggcaagatcattccagccggggcatgaagctccgaagcgggtccgc<br/> ttccaggtaggcttcatcaccactgacctgacctatagcgtgagtcagaactacaggcagcgagta<br/> ataaaacaagcgaacacccgcacctttgccaggcgcgactttgaacagagtaagccatcaaatct<br/> ccctaaactttacagcaaaccggcatgcttaagcgcgctctga<b>CCGTCTCACGACCACTG</b><br/> <b>TCGGTGATTGGTGTTCATTGGCAGATTACAGTCTTGAGCGATTGTGTA</b><br/> <b>GGCTGGAGCTGCTCGAAGTTCCTATACTTTCTAGAGAATAGGAACCT</b><br/> <b>CGGAATAGGAACCTAAGGAGGATATTCATATGGACCATGGCTAATTCCC</b><br/> <b>ATGTCAGATCGGAGTAACAATCGCGACAATACTTCCCCTGAACATGGG</b><br/> ccatcctctgtgcaacaagtgtctcaatggtacgtttggtatggcattaaaagcaagcagacagaacc<br/> gttctgattgtgatgcatgttttttatgcttcccttaagaacaactcacccttgaaggaataaccagttt<br/> gacctgtcatcgcacattatctggtgatcactgcgttgggtgccgatcgccctggaatagtgaacac<br/> catcaccctgatgtcagtagttgcggctgtaataattgaagacagtcgcctggcgatgctgggagaag<br/> agttcacgtttatcatgctgtttccggttcatggaatgccattactctgattgaatcaacgttaccgttga<br/> aggtgccgagctggatctttaaactgtaggaagcgcacgacggcgcgtccgcgtccgccaatgcca<br/> gcatctgtctgggttcaggctgatgtggcagactccccgatttaattgaacgcttcacagcacttttga<br/> cacgcatcatatgaacattgcggagctgggtgctgcgcacgcaacctgctgaaaatgaaagggctgcg<br/> cagttgcatattcagataactgccacagccccgcatctcggacgcagcaaatattgagcaagcgtt<br/> caaagccctatgtacagaactcaatgcacaaggcagttataacgtcgtcaattatccaacatgatga<br/> acaggatggagtttaagtaataatccactgaaagccgggtgatacgcaccgaaatttagcttgccggat<br/> caagacggagaacaagttaatttgaccgactccagggacagcgtgttctggttatttctaccgaaa<br/> gccatgacccccggctgtaccgtacaggcctgcggcttacgcgataacatggatgagttgaaaaaag<br/> cgggcgttgatgtgctgggtatcagcaccgataaaccgaaaaactctcccgttttgcggaaaaagag<br/> ctgcttaactttacgctcctgtctgatgagg</p> | <p>The uppercase, bolded blue letters represent the engineered region of the EcN genome, including the EcN sequence homology used for homologous recombination into the EcN genome to create the <i>dapA</i> deletion</p> <p>Lowercase black letters include EcN sequence upstream and downstream from the intended genomic insertion location</p> <p>The entire listed sequence here is confirmed by WGS</p> |

**Supplementary Table 5. Sequence Analysis of the  $\Delta\Phi$  deletion**

| DNA Sequence                                                                                                                                                                                                                                                                                                                                                                                                                                                                                                                                                                                                                                                                                                                                                                                                                                                                                                                                                                                                                                                                                                                                                                                                                                                                                                                                                                                                                                                                                                                                                                                                                                                                                                                                                                                                                                                                                                                                                                                                                                                                                                                                                                                                                                                                                                                                                                                                                                                                                                                                                                                                                                                                                                                                  | Comments                                                                                                                                                                                                                                                                                                                                                                                                         |
|-----------------------------------------------------------------------------------------------------------------------------------------------------------------------------------------------------------------------------------------------------------------------------------------------------------------------------------------------------------------------------------------------------------------------------------------------------------------------------------------------------------------------------------------------------------------------------------------------------------------------------------------------------------------------------------------------------------------------------------------------------------------------------------------------------------------------------------------------------------------------------------------------------------------------------------------------------------------------------------------------------------------------------------------------------------------------------------------------------------------------------------------------------------------------------------------------------------------------------------------------------------------------------------------------------------------------------------------------------------------------------------------------------------------------------------------------------------------------------------------------------------------------------------------------------------------------------------------------------------------------------------------------------------------------------------------------------------------------------------------------------------------------------------------------------------------------------------------------------------------------------------------------------------------------------------------------------------------------------------------------------------------------------------------------------------------------------------------------------------------------------------------------------------------------------------------------------------------------------------------------------------------------------------------------------------------------------------------------------------------------------------------------------------------------------------------------------------------------------------------------------------------------------------------------------------------------------------------------------------------------------------------------------------------------------------------------------------------------------------------------|------------------------------------------------------------------------------------------------------------------------------------------------------------------------------------------------------------------------------------------------------------------------------------------------------------------------------------------------------------------------------------------------------------------|
| <p>cgaagatggtcagtgattcttttggcagggtgaacttctctttttcagaaacatgctccttcttacgctgcagttac<br/>           ggtaactttgcagaccgcaacgaaattaccgctcgtggtcataacaataacgtcagcgggtgctgcccaccacgc<br/>           cggtgacgggtatcgcallaccgtaacggtagcgttcttttggccgctctgaggtgccacacggaacgag<br/>           gtatctgaggcactggctgggtaaacgtaacgtgacgttgggtgcccggacggccacgcttgccgtgggt<br/>           ttatcagcgtaacgctgtcacgggatattcgggggtcccgttctctgcccagttccggctgcccgtattggt<br/>           aatctcgtgtacgggtatgacctctttgcccgaatggctttaccaggctgctgcaccagccgcggaaaacg<br/>           tcgacggtagcgttgggtattgatttgaatagcgtactgagccatcaataaacatgcgacaaggctcttttgc<br/>           ccttctcggccggcttcaggcggggatgagggatgagcaggtatgccagcagatttggcccctgggcccgtcgcgt<br/>           ccagtcggcctcctcgtcgtcaggttaagtgtcgtacatcagctcggcgggtatctcggccggcgtcagctctta<br/>           atttcgccaggcgggtccagtcgatatccgagagtggttagcgaagcgttggccgttccgggtgtaaagccag<br/>           aggggtgtagcggcaccttcacaggggcccagcgggttggagtaggcataagtacctctaaattgaatagggtg<br/>           attaagtagtgaaatcactgaaccccagggtggcattcatcatcccgtgatagtcataaccctcgggggtg<br/>           aacgtctcgaccagttcggtagacctgggatgaaggccattgccggatacacttctcttccatccaggaatcaa<br/>           gcgcgtgctggggc<b>TGGAGGCTTTAAGAAATACCTCGATGTGAACAACCGCCTGC</b><br/> <b>CACGAATCTTCGTCAAGCGATTACACGTCTTGAGCGATTGTGTAGGCTGGAG</b><br/> <b>CTGCTTCGAAGTTCCTATACTTTCTAGAGAATAGGAACTTCGGAATAGGAACT</b><br/> <b>AAGGAGGATATTCATATGGACCATGGCTAATTCCTCATGTCAGATCCAGTGAT</b><br/> <b>TCTGAATAGGCGATAAGTCCGGTATAACCGGGGATAAT</b>tcaccattatcagcttcaaat<br/>           tcaggaattgcccgggtggtgatggtgattgaggctggccatcttctcgcgaaggctgccaggtcttcaatct<br/>           gcttagctgtaagaactactgtcatgctcattcctcagttgaaaaaacccccgcagtgccagggcagttgattg<br/>           aattctcggctcttatctcagcgcagccccctactgctgcccgggtgctcgggtgatgagcatcagcagatgagaca<br/>           taaagccgaccgaaggccagcggcgttctcatgtgccagagccatcgcacaagaggacgaaaacta<br/>           gcagcatgaatgcctattggttattcagcagtcgactgattcgtaaatccgctcacacgtattctgcccggta<br/>           gcttctcagatcgtccagcataatcagcgtcttctgcaaggctccgagcatgctggcaagcattgctgctg<br/>           ttgctccggctgtttgcttctgacggaagtggcgagatctgcccgtgcttgcggcgtccatgtgggtagcga<br/>           gtttggcttccggcgcagctgcttaacagtggtagccaggccagcagaagtaacggcagcgtcgtcgtgct<br/>           gagcttgagcatcttaacggcctcatccccggcgattgttcgcccttgtcaatcatacagctgcccgtctgtgca<br/>           ttcgcttctgtgaagattccgcgtatccccggcagcccactttatttccagctgcccgttccactcactgcc<br/>           gcgagaaacgaacctaccaacgcaacaatcacaatgatgcagatgccaccggcttactggctctatccccca<br/>           gcagctcagtgccgttctggtcccggcttacctgcccataaacatccatcttctggcccttggtcagggcg<br/>           caatcggccaccgctttaatccaccagcggatagcttcacaggctcttctgtagcgcagcattaa</p> | <p>The uppercase, bolded blue letters represent the engineered region of the EcN genome, including the EcN sequence homology used for homologous recombination into the EcN genome to create the <math>\Phi</math> deletion</p> <p>Lowercase black letters include EcN sequence upstream and downstream from the intended genomic insertion location.</p> <p>Entire listed sequence here is confirmed by WGS</p> |

**Supplementary Table 6. Sequence Analysis of the *thyA* deletion**

| DNA Sequence                                                                                                                                                                                                                                                                                                                                                                                                                                                                                                                                                                                                                                                                                                                                                                                                                                                                                                                                                                                                                                                                                                                                                                                                                                                                                                                                                                                                                                                                                                                                                                                                                                                                                                                                                                                                                                                                                                                                                                                                                                                                                                                                                                                                                                                                                                                                                                                                                                                    | Comments                                                                                                                                                                                                                                                                                                                                                                                                      |
|-----------------------------------------------------------------------------------------------------------------------------------------------------------------------------------------------------------------------------------------------------------------------------------------------------------------------------------------------------------------------------------------------------------------------------------------------------------------------------------------------------------------------------------------------------------------------------------------------------------------------------------------------------------------------------------------------------------------------------------------------------------------------------------------------------------------------------------------------------------------------------------------------------------------------------------------------------------------------------------------------------------------------------------------------------------------------------------------------------------------------------------------------------------------------------------------------------------------------------------------------------------------------------------------------------------------------------------------------------------------------------------------------------------------------------------------------------------------------------------------------------------------------------------------------------------------------------------------------------------------------------------------------------------------------------------------------------------------------------------------------------------------------------------------------------------------------------------------------------------------------------------------------------------------------------------------------------------------------------------------------------------------------------------------------------------------------------------------------------------------------------------------------------------------------------------------------------------------------------------------------------------------------------------------------------------------------------------------------------------------------------------------------------------------------------------------------------------------|---------------------------------------------------------------------------------------------------------------------------------------------------------------------------------------------------------------------------------------------------------------------------------------------------------------------------------------------------------------------------------------------------------------|
| <p>Atgctcctcagacgaaatccaatctggctggactctttaccggttcgcgatcccagataccattactgt<br/> cgcaccccactgcacaatgatacagtcaccctgtccgacaatttcagcccttcgcccgtacagctgcca<br/> tggcaataaccggccctctggagatgcttcgacgaggtaaatacccgagccagatttcatctccagc<br/> gccagcttacgggtgttcgtaaaccttcacgctgaacgcaggcagaaagcgtgcagccccagcaa<br/> caatacgtactgatcgccatgcaatcaacactccagcagagaaaaaccttctcttttacaggcaccc<br/> ttctgtttctcttctgctgacaaaagccggagtcttccccacggcgaaaccaccagccaccactgcccgtt<br/> gagttttgaagcgaatatgcccgccccatgctggtattgcgcaggccaaagaaagcaagcgaaggtgt<br/> caggtcgtcatttcgacttcgggccagcgcggcacaagaccaatggtgaactgcatgacaggtatt<br/> cgccccagcaacggaactcacaaggcaccataacgtcccctccctgataagactgatactgtgctgc<br/> ggttatgccagttggcatcttcagtaaatagagcaaatagtcgccgcctggctggcggtttgccaag<br/> ccgttgcgactgctgccagtattgccagccatagagccacttgcgcttagcatgaccagaatcagcat<br/> cgcgaccagcgtttcaatcagcgtataaccagttgtgtttcatgccggcagtatggagcaggagaa<br/> aaaaagacgagggccagtttctatttcttcggcgcacatctccggactatttacgccgttgcaggacgttgc<br/> aaaatttcgggaaggtgtctcgaagaatttaacggagggcaaaaaaacgcacactggcgtcgc<br/> gctctggcaggatgtttcgaattagata<b>GCCACCGGCGCTTTAATGCCCGGATGTGG<br/> ATCGTATCCTTCATTACACGTCTTGAGCGATTGTGTAGGCTGGAGCTGC<br/> TTCGAAGTTCCTATACTTTCTAGAGAATAGGAACTTCGGAATAGGAACT<br/> AAGGAGGATATTCATATGGACCATGGCTAATTCCCATGTCAGCTTCGTC<br/> GAGCACTTTTTGCATCAGTTCTAAATACTGTTTC</b>atggttctcaggaaacgtgtt<br/> gctgtgggctgcgacgatatgccagaccatcatgatcacaccgcgacaatcatcgggatggaaaga<br/> atgtcccatgtgatgtactgacccaggcaccagtaaacctgcgcgtcgggctggcggaaaaactc<br/> aacaatgatcgaaacgcgccgtaaccaatcaggaacaagcctgagacagctccattgggcgcggt<br/> ttacgaatatacaggttgaggataataaacagcaccacacctccagcagcagctcgtaaagctgtgatg<br/> gggtggcgcggcagcacaccgtaagtgtcgaatatggattgccactgcgggttggttgcagcagcaaa<br/> atatcttctgtacgggagccagggaaacagcatggcaaacgggaagttcgggtcaacgcggcccaca<br/> atcaccgttaataaagttgccagcgcgccagcaccagcaaacggaatgagtggggcaataaaa<br/> tcagagacctggaagaaggaacgttttagtacggcgggcgaagataatcaccacgataacgccaat<br/> caggcctccgtggaaggacatgccgccgtccagacacggaaaagatacagcggatcggccataaa<br/> ctcggggaaattgtagaacagaacataaccaatacgtccaccgaggaagacgccgaggaagcccgc<br/> atagagtaagtttcaacttcatttttggtccagccactgcccggacgattcggcgtcgtgttccagcca<br/> cattgcaaaaatgaaaccaccagatacatcaggccgtaccagtgaagcggcaccgggtcctattgaga<br/> aaatgaccggatcaaacccggaaaatgcagatagctactggtcatctgtcaccacaagttctgttattc<br/> gctgaaagagaacagcgttgaatgcgcgccgaggttcaggcgtccaaaggtgcgaataatag<br/> cacaaggggacctggctggttgc</p> | <p>The uppercase, bolded blue letters represent the engineered region of the EcN genome, including the EcN sequence homology used for homologous recombination into the EcN genome to create the <i>thyA</i> deletion</p> <p>Lowercase black letters include EcN sequence upstream and downstream from the intended genomic insertion location</p> <p>The entire listed sequence here is confirmed by WGS</p> |

**Supplementary Table 7. Primers for SYN1891 modified genomic regions**

| <b>Modified region</b>         | <b>Insertion/ Deletion</b>  | <b>Primer for Insertion/ Deletion</b>                                                   |
|--------------------------------|-----------------------------|-----------------------------------------------------------------------------------------|
| <i>Exo/cea</i>                 | <i>P<sub>fms-dacA</sub></i> | CAGACCTTCAGCCAGAGCAG                                                                    |
|                                |                             | CCCAGAAGGCCGACACAACA                                                                    |
| $\Delta\Phi$                   | deletion                    | TGGAGGCTTTAAGAAATACCTCGATGTGAACAACC<br>GCCTGCCACGAATCTTCGTCAAGCGATTACACGTCT<br>TGAGCGAT |
|                                |                             | GATAATGGTGAGATTATCCCCGGTTATACCGGACTT<br>ATCGCCTATTCAGAATCACTGGATCTGACATGGGA<br>ATTAGCCA |
| <i><math>\Delta</math>dapA</i> | deletion                    | CGTCTCACGACCACTGTCGGTGATTGGTGTCATTGG<br>CAGATTACACGTCTTGAGCGAT                          |
|                                |                             | CCATGTTACAGGGAAGTATTGTCGCGATTGTTACTC<br>CGATCTGACATGGGAATTAGCCA                         |
| <i><math>\Delta</math>thyA</i> | deletion                    | GGTTCACAGGTTGGATCCTGTCACGCTATAGCTGGC<br>ATCCATTACACGTCTTGAGCGAT                         |
|                                |                             | AGAGCAAGGTTTTTCTCTGCTGGAAGTGTTGATTGC<br>CTGACATGGGAATTAGCCA                             |
